# Supplementary material for: Interrelationship between cross-linking structure, molecular stability, and cytocompatibility of amniotic membranes cross-linked with glutaraldehyde of varying concentrations
Source: Royal Society of Chemistry journal article supplement (doi:10.1039/c4ra01930j), 2014-01-01
Supplement: c4ra01930j1.pdf [file c4ra01930j1.pdf]

## Supplementary Information

### Interrelationship between cross-linking structure, molecular stability, and cytocompatibility of amniotic membranes cross-linked with glutaraldehyde of varying concentrations

Jui-Yang Lai\*

*Institute of Biochemical and Biomedical Engineering, Chang Gung University, Taoyuan 33302, Taiwan, ROC. E-mail: [jylai@mail.cgu.edu.tw](mailto:jylai@mail.cgu.edu.tw); Fax: +886 3 2118668; Tel: +886 3 2118800 ext. 3598*

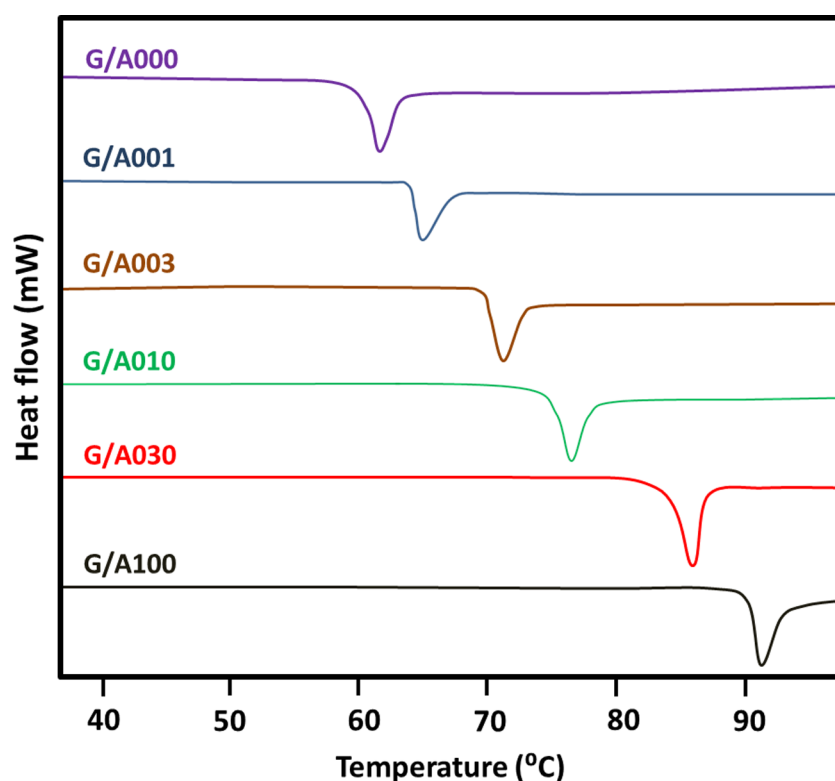

Fig. S1 Typical DSC thermograms of various AM samples.
